# Supplementary material for: Ist die Fachrichtung assoziiert mit der Selbstsicherheit im Umgang mit rationaler Antibiotikaverordnung?
Source: Springer Nature journal article supplement (doi:10.1007/s00101-020-00736-3), 2020-02-13

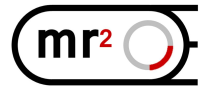

Bitte so markieren:      Bitte verwenden Sie einen Kugelschreiber oder nicht zu starken Filzstift. Dieser Fragebogen wird maschinell erfasst.  
Korrektur:      Bitte beachten Sie im Interesse einer optimalen Datenerfassung die links gegebenen Hinweise beim Ausfüllen.

## 1. Allgemeine Angaben

### 1.1 Zentrums-ID:

|  |  |  |  |  |  |  |  |  |  |
|--|--|--|--|--|--|--|--|--|--|
|  |  |  |  |  |  |  |  |  |  |
|--|--|--|--|--|--|--|--|--|--|

### 1.2 Welcher Fachrichtung gehören Sie aktuell an?

- Innere Medizin                       Chirurgie                                       Gynäkologie  
 Urologie

### 1.3 Welche Position nehmen Sie in Ihrer Klinik ein?

- Chefarzt oder Oberarzt                       Facharzt und hauptverantwortlicher Stationsarzt                       Facharzt ohne stationsärztliche Hauptverantwortung  
 Assistenzarzt und hauptverantwortlicher Stationsarzt                       Assistenzarzt ohne stationsärztliche Hauptverantwortung

## 2. Fragen zu Antibiotikaeinsatz und Resistenzentwicklung

### 2.1 Bei wie vielen Ihrer Patienten wurden durch Sie persönlich in den letzten 7 Arbeitstagen Antibiotika eingesetzt?

- Bei keinem Patienten, da andere Kollegen dafür verantwortlich sind                       Bei keinem Patienten, da Antibiotika-Verordnungen an unserer Klinik stets durch Standardfestlegungen abgesichert sind                       1 bis 2 Patienten  
 3 bis 5 Patienten                       mehr als 5 Patienten

Wenn Sie ein Antibiotikum prophylaktisch oder therapeutisch bei Ihren Patienten verabreichen (würden), trifft welche Ausprägung der folgenden Aussagen für Sie zu?

|                                                                                                            | sehr unsicher            | unsicher                 | sicher                   | sehr sicher              |
|------------------------------------------------------------------------------------------------------------|--------------------------|--------------------------|--------------------------|--------------------------|
| 2.2 Bei der korrekten Wahl von Dosierung, Frequenz und Dauer der Antibiotikagabe bin ich...                | <input type="checkbox"/> | <input type="checkbox"/> | <input type="checkbox"/> | <input type="checkbox"/> |
| 2.3 Bei der Entscheidung darüber, ob eine intravenöse oder orale Antibiotikagabe indiziert ist, bin ich... | <input type="checkbox"/> | <input type="checkbox"/> | <input type="checkbox"/> | <input type="checkbox"/> |
| 2.4 Bei der Interpretation der mikrobiologischen Befunde bin ich...                                        | <input type="checkbox"/> | <input type="checkbox"/> | <input type="checkbox"/> | <input type="checkbox"/> |
| 2.5 Bei der Indikationsstellung zu einer Kombinationstherapie bin ich...                                   | <input type="checkbox"/> | <input type="checkbox"/> | <input type="checkbox"/> | <input type="checkbox"/> |

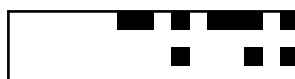

**2. Fragen zu Antibiotikaeinsatz und Resistenzentwicklung [Fortsetzung]**

2.6 Welche Aspekte beeinflussen Ihre Entscheidung maßgeblich, welches Antibiotikum Sie kalkuliert bei einer Infektion ohne vorliegende Resistenzbestimmung verabreichen?

- Fachspezifische Leitlinien       Klinikinterne Leitlinien       Beratung im Klinikteam  
 Beratung mit einem Mikrobiologen oder Hygieneverantwortlichen

2.7 Wie hoch schätzen Sie im Einzugsgebiet Ihrer Klinik die Resistenzwahrscheinlichkeit von E. coli gegenüber Fluorchinolonen ein?

- Ich habe überhaupt keine Vorstellung       unter 5 %       5 - 20 %  
 21 - 40 %       41 - 60 %       über 60 %

Wie würden Sie selbst Ihren Kenntnisstand hinsichtlich nachfolgender Themen einschätzen?

**A** - keine Kenntnis, **B** - kein anwendungsbereites Wissen darüber,  
**C** - anwendungsbereites Wissen mit Lücken, **D** - vollständiges Wissen darüber

|                                                                                                                                                                | keine Kenntnis => vollständiges Wissen |                                     |                                       |                          |                              |
|----------------------------------------------------------------------------------------------------------------------------------------------------------------|----------------------------------------|-------------------------------------|---------------------------------------|--------------------------|------------------------------|
|                                                                                                                                                                | A                                      | B                                   | C                                     | D                        |                              |
| 2.8 Maßnahmen des Antibiotic Stewardships (ABS)                                                                                                                | <input type="checkbox"/>               | <input type="checkbox"/>            | <input type="checkbox"/>              | <input type="checkbox"/> | keine Kenntnis               |
| 2.9 Erregerresistenzen Ihres Klinikums                                                                                                                         | <input type="checkbox"/>               | <input type="checkbox"/>            | <input type="checkbox"/>              | <input type="checkbox"/> | vollständiges Wissen darüber |
| 2.10 Antibiotikaverbrauch Ihres Klinikums                                                                                                                      | <input type="checkbox"/>               | <input type="checkbox"/>            | <input type="checkbox"/>              | <input type="checkbox"/> |                              |
| 2.11 Patientengruppe mit Indikation zum MRSA-Screening (aufgrund bestimmter Risikofaktoren)                                                                    | <input type="checkbox"/>               | <input type="checkbox"/>            | <input type="checkbox"/>              | <input type="checkbox"/> |                              |
| 2.12 Patientengruppe mit Indikation zum MRGN-Screening (aufgrund bestimmter Risikofaktoren)                                                                    | <input type="checkbox"/>               | <input type="checkbox"/>            | <input type="checkbox"/>              | <input type="checkbox"/> |                              |
| 2.13 Patientengruppe mit Isolierpflicht                                                                                                                        | <input type="checkbox"/>               | <input type="checkbox"/>            | <input type="checkbox"/>              | <input type="checkbox"/> |                              |
| 2.14 Definition von 3-MRGN und 4-MRGN                                                                                                                          | <input type="checkbox"/>               | <input type="checkbox"/>            | <input type="checkbox"/>              | <input type="checkbox"/> |                              |
| 2.15 Hygienemaßnahmen und Hygienestandards Ihres Klinikums                                                                                                     | <input type="checkbox"/>               | <input type="checkbox"/>            | <input type="checkbox"/>              | <input type="checkbox"/> |                              |
| 2.16 Aktuelle Regeln der Händedesinfektion                                                                                                                     | <input type="checkbox"/>               | <input type="checkbox"/>            | <input type="checkbox"/>              | <input type="checkbox"/> |                              |
| 2.17 Art der Erfolgskontrolle der Hygienemaßnahmen durch verantwortliche Klinikmitarbeiter                                                                     | <input type="checkbox"/>               | <input type="checkbox"/>            | <input type="checkbox"/>              | <input type="checkbox"/> |                              |
| 2.18 10-Punkte-Plan zur Vermeidung behandlungsassoziierter Infektionen und Antibiotikaresistenzen durch das Bundesministerium für Gesundheit aus dem Jahr 2015 | <input type="checkbox"/>               | <input type="checkbox"/>            | <input type="checkbox"/>              | <input type="checkbox"/> |                              |
| 2.19 Meldepflicht und diesbezügliche Verantwortlichkeit bei bestimmten multiresistenten Erregern                                                               | <input type="checkbox"/>               | <input type="checkbox"/>            | <input type="checkbox"/>              | <input type="checkbox"/> |                              |
| 2.20 Vorgehen beim Mixing bzw. Cycling antibiotischer Therapieregimes                                                                                          | <input type="checkbox"/>               | <input type="checkbox"/>            | <input type="checkbox"/>              | <input type="checkbox"/> |                              |
| 2.21 Haben Sie in den letzten 12 Monaten an einer Fortbildung zum Thema Antibiotika-Verordnung und multiresistente Erreger teilgenommen?                       |                                        |                                     |                                       |                          |                              |
|                                                                                                                                                                | <input type="checkbox"/> Nein          | <input type="checkbox"/> Ja, einmal | <input type="checkbox"/> Ja, mehrmals |                          |                              |

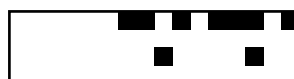

**2. Fragen zu Antibiotikaeinsatz und Resistenzentwicklung [Fortsetzung]**

Die folgenden Szenarien sind potentielle Ursachen für die gegenwärtige Zunahme der Antibiotikaresistenzen - bewerten Sie bitte die Wichtigkeit der Punkte aus Ihrer Sicht.

|                                                                                                                                                                                            | keine Bedeutung                                                                  | geringe Bedeutung                                                                                  | erhöhte Bedeutung        | besonders hohe Bedeutung |
|--------------------------------------------------------------------------------------------------------------------------------------------------------------------------------------------|----------------------------------------------------------------------------------|----------------------------------------------------------------------------------------------------|--------------------------|--------------------------|
| 2.22 Unsachgemäßer und exzessiver Einsatz von Antibiotika in der Tierhaltung                                                                                                               | <input type="checkbox"/>                                                         | <input type="checkbox"/>                                                                           | <input type="checkbox"/> | <input type="checkbox"/> |
| 2.23 Zu häufige Verschreibung von Antibiotika in der Humanmedizin                                                                                                                          | <input type="checkbox"/>                                                         | <input type="checkbox"/>                                                                           | <input type="checkbox"/> | <input type="checkbox"/> |
| 2.24 Zu häufiger Einsatz von Breitspektrum-Antibiotika in der Humanmedizin                                                                                                                 | <input type="checkbox"/>                                                         | <input type="checkbox"/>                                                                           | <input type="checkbox"/> | <input type="checkbox"/> |
| 2.25 Zu kurze oder zu lange Verabreichung von Antibiotika in der Humanmedizin                                                                                                              | <input type="checkbox"/>                                                         | <input type="checkbox"/>                                                                           | <input type="checkbox"/> | <input type="checkbox"/> |
| 2.26 Unzureichende Händedesinfektion und Hygienestandards bei medizinischem Personal                                                                                                       | <input type="checkbox"/>                                                         | <input type="checkbox"/>                                                                           | <input type="checkbox"/> | <input type="checkbox"/> |
| 2.27 Unzureichende Kenntnis und Umsetzung der Leitlinien über eine rationale Antibiotika-Verordnung                                                                                        | <input type="checkbox"/>                                                         | <input type="checkbox"/>                                                                           | <input type="checkbox"/> | <input type="checkbox"/> |
| 2.28 Zu wenige Überwachungsmaßnahmen über eine rationale Antibiotika-Verordnung                                                                                                            | <input type="checkbox"/>                                                         | <input type="checkbox"/>                                                                           | <input type="checkbox"/> | <input type="checkbox"/> |
| 2.29 Zu wenige Schulungsangebote und keine Fortbildungspflicht für medizinisches Personal zum Erlernen einer rationalen Antibiotika-Verordnung                                             | <input type="checkbox"/>                                                         | <input type="checkbox"/>                                                                           | <input type="checkbox"/> | <input type="checkbox"/> |
| 2.30 Zu hoher Einfluß der pharmazeutischen Industrie                                                                                                                                       | <input type="checkbox"/>                                                         | <input type="checkbox"/>                                                                           | <input type="checkbox"/> | <input type="checkbox"/> |
| 2.31 Pharmaindustrie forscht nur unzureichend an neuen potenten Antibiotika                                                                                                                | <input type="checkbox"/>                                                         | <input type="checkbox"/>                                                                           | <input type="checkbox"/> | <input type="checkbox"/> |
| 2.32 Keine die verschiedenen Länder übergreifende globale Strategie zur Bekämpfung der zunehmenden Antibiotika-Resistenzen                                                                 | <input type="checkbox"/>                                                         | <input type="checkbox"/>                                                                           | <input type="checkbox"/> | <input type="checkbox"/> |
| 2.33 Zu häufige und zu lange Einlage von infektionsbegünstigenden Fremdkörpern (z.B. Urin-Dauerkatheter)                                                                                   | <input type="checkbox"/>                                                         | <input type="checkbox"/>                                                                           | <input type="checkbox"/> | <input type="checkbox"/> |
| 2.34 Zu wenig geschultes Hygienefachpersonal in Kliniken und Praxen                                                                                                                        | <input type="checkbox"/>                                                         | <input type="checkbox"/>                                                                           | <input type="checkbox"/> | <input type="checkbox"/> |
| <b>2.35 Wird in den Arztbriefen Ihrer Klinik auf die aktuelle oder anamnestische Besiedlung mit multiresistenten Erregern und ggf. notwendige weitere Kontrollen explizit hingewiesen?</b> |                                                                                  |                                                                                                    |                          |                          |
| <input type="checkbox"/> Weiß ich nicht                                                                                                                                                    | <input type="checkbox"/> Niemals                                                 | <input type="checkbox"/> in unter 50 % der Fälle                                                   |                          |                          |
| <input type="checkbox"/> in 50 - 99 % der Fälle                                                                                                                                            | <input type="checkbox"/> Immer (zu 100 %)                                        |                                                                                                    |                          |                          |
| <b>2.36 Eine unkomplizierte Harnwegsinfektion bei einer 61-jährigen stark symptomatischen Patientin behandeln Sie mit:</b>                                                                 |                                                                                  |                                                                                                    |                          |                          |
| <input type="checkbox"/> Schmalspektrum-Antibiotikum ohne Resistenzbestimmung                                                                                                              | <input type="checkbox"/> Breitspektrum-Antibiotikum ohne Resistenzbestimmung     | <input type="checkbox"/> Schmalspektrum-Antibiotikum, ggf. mit Umstellung nach Resistenzbestimmung |                          |                          |
| <input type="checkbox"/> Breitspektrum-Antibiotikum, ggf. mit Umstellung nach Resistenzbestimmung                                                                                          | <input type="checkbox"/> Vorerst kein Antibiotikum, rein symptomatische Therapie |                                                                                                    |                          |                          |

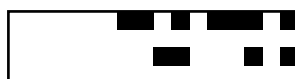

Supplement: MOESM1 [file 17698100]
