# Supplementary material for: Ist die Fachrichtung assoziiert mit der Selbstsicherheit im Umgang mit rationaler Antibiotikaverordnung?
Source: Springer Nature journal article supplement (doi:10.1007/s00101-020-00736-3), 2020-02-13

mr2\_Anästhesie

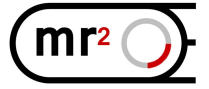

Bitte so markieren:      Bitte verwenden Sie einen Kugelschreiber oder nicht zu starken Filzstift. Dieser Fragebogen wird maschinell erfasst.

Korrektur:      Bitte beachten Sie im Interesse einer optimalen Datenerfassung die links gegebenen Hinweise beim Ausfüllen.

## 1. Allgemeine Angaben

### 1.1 Zentrums-ID:

|  |  |  |  |  |  |  |  |  |  |  |  |  |  |
|--|--|--|--|--|--|--|--|--|--|--|--|--|--|
|  |  |  |  |  |  |  |  |  |  |  |  |  |  |
|--|--|--|--|--|--|--|--|--|--|--|--|--|--|

### 1.2 Welchen beruflichen Ausbildungsstand haben Sie bisher erreicht?

- Weiterbildungsassistent  
 Facharzt für Anästhesiologie  
 Facharzt Anästhesiologie und Intensivmedizin

### 1.3 Welche Position nehmen Sie in Ihrer Klinik ein?

- Assistenzarzt  
 Facharzt  
 Chefarzt oder Oberarzt

### 1.4 Wie viel Prozent Ihrer beruflichen Tätigkeit waren Sie in den letzten 12 Monaten auf der Intensivstation tätig? (Bei kürzerer Ausbildungszeit bitte diesen Zeitraum zu Grunde legen)

- 100%  
 > 50% bis 99%  
 1% bis 50%  
 Überhaupt nicht

### 1.5 Welchem Geschlecht gehören Sie an?

- Weiblich  
 Männlich

## 2. Fragen zu Antibiotikaeinsatz und Resistenzentwicklung

### 2.1 Bei wie vielen Ihrer Patienten wurden durch Sie persönlich in den letzten 7 Arbeitstagen Antibiotika eingesetzt?

- Bei keinem Patienten, da andere Kollegen dafür verantwortlich sind  
 1 bis 2 Patienten  
 3 bis 5 Patienten  
 mehr als 5 Patienten

Wenn Sie ein Antibiotikum prophylaktisch oder therapeutisch bei Ihren Patienten verabreichen (würden), trifft welche Ausprägung der folgenden Aussagen für Sie zu?

|                                                                                                            | sehr unsicher            | unsicher                 | sicher                   | sehr sicher              |
|------------------------------------------------------------------------------------------------------------|--------------------------|--------------------------|--------------------------|--------------------------|
| 2.2 Bei der Auswahl der mikrobiologischen Diagnostik bin ich...                                            | <input type="checkbox"/> | <input type="checkbox"/> | <input type="checkbox"/> | <input type="checkbox"/> |
| 2.3 Bei der Interpretation der mikrobiologischen Befunde bin ich...                                        | <input type="checkbox"/> | <input type="checkbox"/> | <input type="checkbox"/> | <input type="checkbox"/> |
| 2.4 Bei der korrekten Auswahl der passenden Substanz bin ich...                                            | <input type="checkbox"/> | <input type="checkbox"/> | <input type="checkbox"/> | <input type="checkbox"/> |
| 2.5 Bei der korrekten Wahl von Dosierung, Frequenz und Dauer der Antibiotikagabe bin ich...                | <input type="checkbox"/> | <input type="checkbox"/> | <input type="checkbox"/> | <input type="checkbox"/> |
| 2.6 Bei der Entscheidung darüber, ob eine intravenöse oder orale Antibiotikagabe indiziert ist, bin ich... | <input type="checkbox"/> | <input type="checkbox"/> | <input type="checkbox"/> | <input type="checkbox"/> |
| 2.7 Bei der Indikationsstellung zu einer Kombinationstherapie bin ich...                                   | <input type="checkbox"/> | <input type="checkbox"/> | <input type="checkbox"/> | <input type="checkbox"/> |

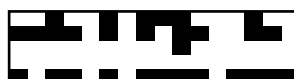

**2. Fragen zu Antibiotikaeinsatz und Resistenzentwicklung [Fortsetzung]**

2.8 **Welcher Aspekt beeinflusst Ihre Entscheidung maßgeblich, welches Antibiotikum Sie kalkuliert bei einer Infektion ohne vorliegende Resistenzbestimmung verabreichen? (Bitte auf das "wichtigste Hilfsmittel" beschränken, d.h. auch hier keine Mehrfachnennungen!)**

- |                                                                                        |                                                             |                                                          |
|----------------------------------------------------------------------------------------|-------------------------------------------------------------|----------------------------------------------------------|
| <input type="checkbox"/> Fachspezifische Leitlinien                                    | <input type="checkbox"/> Klinikinterne Leitlinien           | <input type="checkbox"/> Beratung im Klinikteam          |
| <input type="checkbox"/> Beratung mit einem Mikrobiologen oder Hygieneverantwortlichen | <input type="checkbox"/> Entscheidung nach eigenem Ermessen | <input type="checkbox"/> Entscheidung durch andere Ärzte |

2.9 **Wie hoch schätzen Sie in IHREM GESAMTKLINIKUM die MRSA-Rate bei Staph. aureus ein?**

- |                                                               |                                    |                                    |
|---------------------------------------------------------------|------------------------------------|------------------------------------|
| <input type="checkbox"/> Ich habe überhaupt keine Vorstellung | <input type="checkbox"/> unter 5 % | <input type="checkbox"/> 5 - 20 %  |
| <input type="checkbox"/> 21 - 40 %                            | <input type="checkbox"/> 41 - 60 % | <input type="checkbox"/> über 60 % |

2.10 **Wie hoch schätzen Sie in IHREM GESAMTKLINIKUM die Resistenzwahrscheinlichkeit von E. coli gegenüber Ciprofloxacin ein?**

- |                                                               |                                    |                                    |
|---------------------------------------------------------------|------------------------------------|------------------------------------|
| <input type="checkbox"/> Ich habe überhaupt keine Vorstellung | <input type="checkbox"/> unter 5 % | <input type="checkbox"/> 5 - 20 %  |
| <input type="checkbox"/> 21 - 40 %                            | <input type="checkbox"/> 41 - 60 % | <input type="checkbox"/> über 60 % |

**Wie würden Sie selbst Ihren Kenntnisstand hinsichtlich nachfolgender Themen einschätzen?**

**A** - keine Kenntnis, **B** - kein anwendungsbereites Wissen darüber,  
**C** - anwendungsbereites Wissen mit Lücken, **D** - vollständiges Wissen darüber

keine Kenntnis => vollständiges Wissen

2.11 Maßnahmen des Antibiotic Stewardships (ABS)

|                |                          |                          |                          |                                                       |
|----------------|--------------------------|--------------------------|--------------------------|-------------------------------------------------------|
|                | A                        | B                        | C                        | D                                                     |
| keine Kenntnis | <input type="checkbox"/> | <input type="checkbox"/> | <input type="checkbox"/> | <input type="checkbox"/> vollständiges Wissen darüber |

2.12 Erregerresistenzen Ihres Klinikums

2.13 Antibiotikaverbrauch Ihres Klinikums

2.14 Patientengruppe mit Indikation zum MRSA-Screening (aufgrund bestimmter Risikofaktoren)

2.15 Patientengruppe mit Indikation zum MRGN-Screening (aufgrund bestimmter Risikofaktoren)

2.16 Patientengruppe mit Isolierpflicht

2.17 Definition von 3-MRGN und 4-MRGN

2.18 Hygienemaßnahmen und Hygienestandards Ihres Klinikums

2.19 Aktuelle Regeln der Händedesinfektion

2.20 Art der Erfolgskontrolle der Hygienemaßnahmen durch verantwortliche Klinikmitarbeiter

2.21 DART 2020 (Deutsche Antibiotika-Resistenzstrategie)

2.22 "Choosing-Wisely-Initiative" der Deutschen Gesellschaft für Infektiologie (DGI)

2.23 Meldepflicht und diesbezügliche Verantwortlichkeit bei bestimmten multiresistenten Erregern

2.24 Vorgehen beim Mixing bzw. Cycling antibiotischer Therapieregimes

2.25 Vorgehen bei Infektionen mit Clostridium difficile

2.26 Maßnahmen bei Vancomycin-resistenten Enterokokken (VRE)

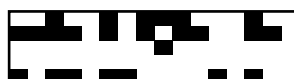

**2. Fragen zu Antibiotikaeinsatz und Resistenzentwicklung [Fortsetzung]**

2.27 Haben Sie in den letzten 12 Monaten an einer Fortbildung zum Thema Antibiotika-Verordnung oder multiresistente Erreger teilgenommen?

 Nein Ja, einmal Ja, mehrmals

Die folgenden Szenarien sind potentielle Ursachen für die gegenwärtige Zunahme der Antibiotikaresistenzen - bewerten Sie bitte die Wichtigkeit der Punkte aus Ihrer Sicht.

|                                                                                                                                                                                                                 | keine Bedeutung                           | geringe Bedeutung                                | erhöhte Bedeutung        | besonders hohe Bedeutung |
|-----------------------------------------------------------------------------------------------------------------------------------------------------------------------------------------------------------------|-------------------------------------------|--------------------------------------------------|--------------------------|--------------------------|
| 2.28 Unsachgemäßer und exzessiver Einsatz von Antibiotika in der Tierhaltung                                                                                                                                    | <input type="checkbox"/>                  | <input type="checkbox"/>                         | <input type="checkbox"/> | <input type="checkbox"/> |
| 2.29 Zu häufige Verschreibung von Antibiotika im ambulanten Bereich                                                                                                                                             | <input type="checkbox"/>                  | <input type="checkbox"/>                         | <input type="checkbox"/> | <input type="checkbox"/> |
| 2.30 Zu häufige Verwendung von Antibiotika im stationären Bereich                                                                                                                                               | <input type="checkbox"/>                  | <input type="checkbox"/>                         | <input type="checkbox"/> | <input type="checkbox"/> |
| 2.31 Zu kurze oder zu lange Verabreichung von Antibiotika in der Humanmedizin                                                                                                                                   | <input type="checkbox"/>                  | <input type="checkbox"/>                         | <input type="checkbox"/> | <input type="checkbox"/> |
| 2.32 Unzureichende Händedesinfektion und Hygienestandards bei medizinischem Personal                                                                                                                            | <input type="checkbox"/>                  | <input type="checkbox"/>                         | <input type="checkbox"/> | <input type="checkbox"/> |
| 2.33 Unzureichende Kenntnis und Umsetzung der Leitlinien über eine rationale Antibiotika-Verordnung                                                                                                             | <input type="checkbox"/>                  | <input type="checkbox"/>                         | <input type="checkbox"/> | <input type="checkbox"/> |
| 2.34 Zu wenige Überwachungsmaßnahmen über eine rationale Antibiotika-Verordnung                                                                                                                                 | <input type="checkbox"/>                  | <input type="checkbox"/>                         | <input type="checkbox"/> | <input type="checkbox"/> |
| 2.35 Zu wenige Schulungsangebote und keine Fortbildungspflicht für medizinisches Personal zum Erlernen einer rationalen Antibiotika-Verordnung                                                                  | <input type="checkbox"/>                  | <input type="checkbox"/>                         | <input type="checkbox"/> | <input type="checkbox"/> |
| 2.36 Unterdosierung der Antibiotika aufgrund nicht durchgeführtem therapeutischen Drugmonitoring                                                                                                                | <input type="checkbox"/>                  | <input type="checkbox"/>                         | <input type="checkbox"/> | <input type="checkbox"/> |
| 2.37 Pharmaindustrie forscht nur unzureichend an neuen potenten Antibiotika                                                                                                                                     | <input type="checkbox"/>                  | <input type="checkbox"/>                         | <input type="checkbox"/> | <input type="checkbox"/> |
| 2.38 Keine die verschiedenen Länder übergreifende globale Strategie zur Bekämpfung der zunehmenden Antibiotika-Resistenzen                                                                                      | <input type="checkbox"/>                  | <input type="checkbox"/>                         | <input type="checkbox"/> | <input type="checkbox"/> |
| 2.39 Zu häufige und zu lange Einlage von infektionsbegünstigenden Fremdkörpern (z.B. Urin-Dauerkatheter)                                                                                                        | <input type="checkbox"/>                  | <input type="checkbox"/>                         | <input type="checkbox"/> | <input type="checkbox"/> |
| 2.40 Zu wenig geschultes Hygienefachpersonal in Kliniken und Praxen                                                                                                                                             | <input type="checkbox"/>                  | <input type="checkbox"/>                         | <input type="checkbox"/> | <input type="checkbox"/> |
| 2.41 Wird in den Arztbriefen bzw. Epikrisen Ihrer Intensivstation auf die aktuelle oder anamnestische Besiedlung mit multiresistenten Erregern und ggf. auf notwendige weitere Kontrollen explizit hingewiesen? | <input type="checkbox"/>                  | <input type="checkbox"/>                         | <input type="checkbox"/> | <input type="checkbox"/> |
| <input type="checkbox"/> Weiß ich nicht                                                                                                                                                                         | <input type="checkbox"/> Niemals          | <input type="checkbox"/> in unter 50 % der Fälle |                          |                          |
| <input type="checkbox"/> in 50 - 99 % der Fälle                                                                                                                                                                 | <input type="checkbox"/> Immer (zu 100 %) |                                                  |                          |                          |

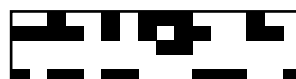

**2. Fragen zu Antibiotikaeinsatz und Resistenzentwicklung [Fortsetzung]**

2.42 **Wie würden Sie mit den angegebenen Antibiotika bei einer Operation mit Einbau einer Knie-TEP bei einem ansonsten gesunden Patienten die perioperative Prophylaxe durchführen (keine Mehrfachnennungen möglich):**

- |                                                 |                                              |                                                |
|-------------------------------------------------|----------------------------------------------|------------------------------------------------|
| <input type="checkbox"/> Ciprofloxacin einmalig | <input type="checkbox"/> Ceftriaxon einmalig | <input type="checkbox"/> Penicillin G einmalig |
| <input type="checkbox"/> Vancomycin einmalig    | <input type="checkbox"/> Cefazolin für 3 d   | <input type="checkbox"/> Cefazolin einmalig    |

2.43 **Wie würden Sie mit den angegebenen Antibiotika bei einer Operation in der kolorektalen Chirurgie bei einem ansonsten gesunden Patienten die perioperative Prophylaxe durchführen (keine Mehrfachnennungen möglich):**

- |                                                           |                                                |                                             |
|-----------------------------------------------------------|------------------------------------------------|---------------------------------------------|
| <input type="checkbox"/> Cefuroxim/Metronidazol einmalig  | <input type="checkbox"/> Metronidazol einmalig | <input type="checkbox"/> Meropenem einmalig |
| <input type="checkbox"/> Piperacillin/Tazobactam einmalig | <input type="checkbox"/> Penicillin G einmalig |                                             |

2.44 **Wie ist in Ihrer Klinik die Gabe von Antibiotika zur perioperativen Prophylaxe geregelt? (keine Mehrfachnennungen möglich)**

- |                                                              |                                                   |                                   |
|--------------------------------------------------------------|---------------------------------------------------|-----------------------------------|
| <input type="checkbox"/> Entscheidung Operateur              | <input type="checkbox"/> Entscheidung Anästhesist | <input type="checkbox"/> Sonstige |
| <input type="checkbox"/> Hinterlegter konsentierter Standard | <input type="checkbox"/> Nicht geregelt           |                                   |

2.45 **Wann ist der optimale Zeitpunkt für die intravenöse prophylaktische Gabe von Cefazolin vor dem operativen Eingriff?**

- |                                                  |                                                  |                                                      |
|--------------------------------------------------|--------------------------------------------------|------------------------------------------------------|
| <input type="checkbox"/> 2 h vor dem Hautschnitt | <input type="checkbox"/> 1 h vor dem Hautschnitt | <input type="checkbox"/> 30 min nach dem Hautschnitt |
| <input type="checkbox"/> Zum Hautschnitt         | <input type="checkbox"/> Spielt keine Rolle      |                                                      |

2.46 **Wer ist bei einem langen operativen Eingriff (>6 h OP-Dauer) dafür verantwortlich, dass eine zweite prophylaktische Dosis vom Antibiotikum gegeben wird?**

- |                                                              |                                                   |                                   |
|--------------------------------------------------------------|---------------------------------------------------|-----------------------------------|
| <input type="checkbox"/> Entscheidung Operateur              | <input type="checkbox"/> Entscheidung Anästhesist | <input type="checkbox"/> Sonstige |
| <input type="checkbox"/> Hinterlegter konsentierter Standard | <input type="checkbox"/> Nicht geregelt           |                                   |

2.47 **Gibt es an Ihrer Klinik ausreichend Weiterbildungsangebote für Anästhesisten zum Thema Antiinfektiva?**

- |                             |                               |                                                     |
|-----------------------------|-------------------------------|-----------------------------------------------------|
| <input type="checkbox"/> Ja | <input type="checkbox"/> Nein | <input type="checkbox"/> Kann ich nicht beantworten |
|-----------------------------|-------------------------------|-----------------------------------------------------|

2.48 **Sollte Ihrer Meinung nach Antiinfektive Therapie in die Weiterbildungsordnung für Anästhesisten aufgenommen werden?**

- |                             |                               |                                                     |
|-----------------------------|-------------------------------|-----------------------------------------------------|
| <input type="checkbox"/> Ja | <input type="checkbox"/> Nein | <input type="checkbox"/> Kann ich nicht beantworten |
|-----------------------------|-------------------------------|-----------------------------------------------------|

2.49 **Erhalten Ihrer Meinung nach Anästhesisten eine adäquate Ausbildung bzw. Schulung in der leitlinienkonformen Verabreichung der Antibiotika?**

- |                             |                               |                                                     |
|-----------------------------|-------------------------------|-----------------------------------------------------|
| <input type="checkbox"/> Ja | <input type="checkbox"/> Nein | <input type="checkbox"/> Kann ich nicht beantworten |
|-----------------------------|-------------------------------|-----------------------------------------------------|

2.50 **Gibt es in Ihrer Abteilung hinterlegte Standards oder klinikinterne Leitlinien, in denen Antibiotikaprophylaxe und antibiotische Therapie klar fixiert sind?**

- |                             |                               |                                                     |
|-----------------------------|-------------------------------|-----------------------------------------------------|
| <input type="checkbox"/> Ja | <input type="checkbox"/> Nein | <input type="checkbox"/> Kann ich nicht beantworten |
|-----------------------------|-------------------------------|-----------------------------------------------------|

2.51 **Könnten Sie sich vorstellen, einen Lehrgang zum Antibiotic Stewardship-Experten (160-Stunden-Kurs) zu belegen? (keine Mehrfachnennungen möglich)**

- |                                                     |                                                                                   |                                                                    |
|-----------------------------------------------------|-----------------------------------------------------------------------------------|--------------------------------------------------------------------|
| <input type="checkbox"/> Ja - ist auch fest geplant | <input type="checkbox"/> Ja - erste ABS-Kursabschnitte wurden auch bereits belegt | <input type="checkbox"/> Ja - ist aber noch nicht fest geplant     |
| <input type="checkbox"/> Nein                       | <input type="checkbox"/> Wusste nicht, dass es dieses Kursangebot gibt            | <input type="checkbox"/> 160h-ABS-Kurs wurde bereits abgeschlossen |

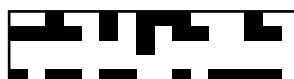

Supplement: MOESM2 [file 17698100]
