# Supplementary material for: Ist die Fachrichtung assoziiert mit der Selbstsicherheit im Umgang mit rationaler Antibiotikaverordnung?
Source: Springer Nature journal article supplement (doi:10.1007/s00101-020-00736-3), 2020-02-13
Supplement: MOESM4 [file 17698100]

## Supplement D Einfluss von Facharzt- und Oberarztstatus sowie Anzahl besuchter Fortbildungen auf Selbstvertrauen und Selbsteinschätzung des eigenen Wissens

### Einfluss von Facharzt- und Oberarztstatus sowie Anzahl besuchter Fortbildungen auf das Selbstvertrauen

| Facharztstatus                                                                                     |                  |          |                        |                  | Oberarztstatus <sup>1)</sup> |                        |                  |                  |                        | Fortbildungsbesuch <sup>2)</sup> |           |                        |                  |          |
|----------------------------------------------------------------------------------------------------|------------------|----------|------------------------|------------------|------------------------------|------------------------|------------------|------------------|------------------------|----------------------------------|-----------|------------------------|------------------|----------|
| MW ± SD Nicht-Facharzt                                                                             | MW ± SD Facharzt | p        | MW ± SD Nicht-Facharzt | MW ± SD Facharzt | p                            | MW ± SD Nicht-Facharzt | MW ± SD Facharzt | p                | MW ± SD Nicht-Facharzt | MW ± SD Facharzt                 | p         | MW ± SD Nicht-Facharzt | MW ± SD Facharzt | p        |
| Selbstvertrauen bei der korrekten Wahl von Dosis, Frequenz und Dauer der Antibiotikatherapie       |                  |          |                        |                  |                              |                        |                  |                  |                        |                                  |           |                        |                  |          |
| 2,49±0,75                                                                                          | 2,93±0,67        | <0,001** | 0,36 (0,25-0,51)       | <0,001**         | 2,60±0,73                    | 3,03±0,65              | <0,001**         | 0,82 (0,53-1,26) | 0,359                  | 2,55±0,74                        | 2,91±0,68 | <0,001**               | 0,47 (0,34-0,63) | <0,001** |
| Selbstvertrauen bei der Entscheidung, ob eine intravenöse oder orale Antibiotikagabe indiziert ist |                  |          |                        |                  |                              |                        |                  |                  |                        |                                  |           |                        |                  |          |
| 2,66±0,72                                                                                          | 3,10±0,67        | <0,001** | 0,44 (0,31-0,63)       | <0,001**         | 2,76±0,71                    | 3,20±0,64              | <0,001**         | 0,58 (0,36-0,94) | 0,027*                 | 2,73±0,71                        | 3,06±0,69 | <0,001**               | 0,74 (0,54-1,01) | 0,062    |
| Selbstvertrauen bei der Interpretation der Mikrobiologischen Befunde                               |                  |          |                        |                  |                              |                        |                  |                  |                        |                                  |           |                        |                  |          |
| 2,81±0,67                                                                                          | 3,03±0,55        | <0,001** | 0,47 (0,32-0,69)       | <0,001**         | 2,86±0,63                    | 3,10±0,55              | <0,001**         | 0,72 (0,44-1,19) | 0,206                  | 2,83±0,63                        | 3,04±0,58 | <0,001**               | 0,80 (0,58-1,12) | 0,199    |
| Selbstvertrauen bei der Indikationsstellung einer antibiotischen Kombinationstherapie              |                  |          |                        |                  |                              |                        |                  |                  |                        |                                  |           |                        |                  |          |
| 2,13±0,65                                                                                          | 2,64±0,68        | <0,001** | 0,32 (0,23-0,45)       | <0,001**         | 2,25±0,65                    | 2,79±0,65              | <0,001**         | 0,60 (0,41-0,86) | 0,005*                 | 2,21±0,66                        | 2,60±0,70 | <0,001**               | 0,46 (0,34-0,61) | <0,001** |

Die Tabelle zeigt die Ergebnisse aus dem Vergleich der Fragen zu Selbstvertrauen und Selbsteinschätzung des eigenen Wissens. Die Ergebnisse der einzelnen Fachgruppen werden als Mittelwert und Standardabweichung (SD) dargestellt. Diese werden sowohl durch einfach Mittelwertvergleiche (p), als auch in einem Logistischen Regressionsmodell (LRM) mit der Referenzkategorie Anästhesie verglichen. Das LRM enthält neben der Fachrichtung die 1) Erfahrung des Arztes (Assistenzarzt vs. Facharzt), 2) seine Position in der Klinik (Oberarzt/Chefarzt vs. Facharzt/Assistenzarzt), 3) die Anzahl an Fortbildungen, die zum entsprechenden Thema während der letzten 12 Monate besucht wurden. Abkürzungen: MW, Mittelwert; SD, Standardabweichung; p, P-Wert der einfachen Mittelwertvergleiche zwischen den Gruppen; OR (95% CI), Odd's ratio im Vergleich zur Referenzgruppe Anästhesie mit 95% Konfidenzintervall; p-MLRM, p-Wert des LRM. 1) Neben den OberärztInnen fallen auch ChefärztInnen in diese Kategorie; 2) Vergleich zwischen Probanden, die im letzten Jahr mindestens eine Fortbildung zum Thema besucht haben und diesen ohne spezifische diesbezügliche Weiterbildung.

## Einfluss von Facharzt- und Oberarztstatus sowie Anzahl besuchter Fortbildungen auf die Selbsteinschätzung des eigenen Wissens

| Facharztstatus                                                                               |                     |          |                               |                     | Oberarztstatus <sup>1)</sup> |                               |                     |                         |                               | Fortbildungsbesuch <sup>2)</sup> |           |                               |                          |          |
|----------------------------------------------------------------------------------------------|---------------------|----------|-------------------------------|---------------------|------------------------------|-------------------------------|---------------------|-------------------------|-------------------------------|----------------------------------|-----------|-------------------------------|--------------------------|----------|
| MW ± SD<br>Nicht-<br>Facharzt                                                                | MW ± SD<br>Facharzt | p        | MW ± SD<br>Nicht-<br>Facharzt | MW ± SD<br>Facharzt | p                            | MW ± SD<br>Nicht-<br>Facharzt | MW ± SD<br>Facharzt | p                       | MW ± SD<br>Nicht-<br>Facharzt | MW ± SD<br>Facharzt              | p         | MW ± SD<br>Nicht-<br>Facharzt | MW ± SD<br>Facharzt      | p        |
| Selbsteinschätzung des eigenen Wissens zu Maßnahmen des Antibiotic Stewardship (ABS)         |                     |          |                               |                     |                              |                               |                     |                         |                               |                                  |           |                               |                          |          |
| 1,69±0,76                                                                                    | 2,28±0,91           | <0,001** | 0,39<br>(0,27-<br>0,56)       | <0,001**            | 1,84±0,82                    | 2,44±0,93                     | <0,001**            | 0,59<br>(0,41-<br>0,85) | 0,005*                        | 1,71±0,79                        | 1,98±0,73 | <0,001**                      | 0,280<br>(0,21-<br>0,38) | <0,001** |
| Selbsteinschätzung des eigenen Wissens zu den Erregerresistenzen des eigenen Klinikums       |                     |          |                               |                     |                              |                               |                     |                         |                               |                                  |           |                               |                          |          |
| 1,96±0,71                                                                                    | 2,48±0,76           | <0,001** | 0,44<br>(0,31-<br>0,62)       | <0,001**            | 2,06±0,73                    | 2,69±0,72                     | <0,001**            | 0,43<br>(0,30-<br>0,61) | <0,001**                      | 1,98±0,73                        | 2,53±0,73 | <0,001**                      | 0,37<br>(0,28-<br>0,49)  | <0,001** |
| Selbsteinschätzung des eigenen Wissens zum Antibiotikaverbrauch des eigenen Klinikums        |                     |          |                               |                     |                              |                               |                     |                         |                               |                                  |           |                               |                          |          |
| 1,73±0,76                                                                                    | 2,25±0,86           | <0,001** | 0,73<br>(0,49-<br>1,08)       | 0,115               | 1,81±0,76                    | 2,52±0,86                     | <0,001**            | 0,32<br>(0,22-<br>0,46) | <0,001**                      | 1,78±0,79                        | 2,26±0,85 | <0,001**                      | 0,52<br>(0,38-<br>0,71)  | <0,001** |
| Selbsteinschätzung des eigenen Wissens zur Patientengruppe mit Indikation zum MRSA Screening |                     |          |                               |                     |                              |                               |                     |                         |                               |                                  |           |                               |                          |          |
| 3,02±0,71                                                                                    | 3,30±0,67           | <0,001** | 0,67<br>(0,43-<br>1,04)       | 0,075               | 3,08±0,70                    | 3,38±0,67                     | <0,001**            | 1,01<br>(0,58-<br>1,73) | 0,984                         | 3,03±0,73                        | 3,31±0,65 | <0,001**                      | 0,49<br>(0,33-<br>0,73)  | <0,001** |
| Selbsteinschätzung des eigenen Wissens zur Patientengruppe mit Indikation zum MRGN Screening |                     |          |                               |                     |                              |                               |                     |                         |                               |                                  |           |                               |                          |          |
| 2,70±0,80                                                                                    | 3,08±0,78           | <0,001** | 0,71<br>(0,51-<br>1,01)       | 0,054               | 2,80±0,80                    | 3,18±0,75                     | <0,001**            | 0,69<br>(0,45-<br>1,05) | 0,081                         | 2,71±0,84                        | 3,12±0,72 | <0,001**                      | 0,47<br>(0,35-<br>0,64)  | <0,001** |
| Selbsteinschätzung des eigenen Wissens zu Patientengruppen mit Isolationspflicht             |                     |          |                               |                     |                              |                               |                     |                         |                               |                                  |           |                               |                          |          |
| 3,01±0,66                                                                                    | 3,26±0,62           | <0,001** | 0,53<br>(0,32-                | 0,010*              | 3,07±0,63                    | 3,34±0,63                     | <0,001**            | 0,94<br>(0,50-          | 0,847                         | 3,00±0,65                        | 3,31±0,60 | <0,001**                      | 0,46<br>(0,30-           | <0,001** |

|                                                                                                       |           |          |                     |        |           |           |          |                     |        |           |           |          |                     |          |
|-------------------------------------------------------------------------------------------------------|-----------|----------|---------------------|--------|-----------|-----------|----------|---------------------|--------|-----------|-----------|----------|---------------------|----------|
|                                                                                                       |           |          | 0,86)               |        |           |           |          | 1,76)               |        |           |           |          | 0,71)               |          |
| Selbsteinschätzung des eigenen Wissens zur Definition von 3- und 4-MRGN                               |           |          |                     |        |           |           |          |                     |        |           |           |          |                     |          |
| 3,13±0,75                                                                                             | 3,43±0,68 | <0,001** | 0,68<br>(0,43-1,08) | 0,106  | 3,22±0,74 | 3,48±0,68 | <0,001** | 0,74<br>(0,41-1,34) | 0,325  | 3,12±0,76 | 3,48±0,64 | <0,001** | 0,37<br>(0,24-0,56) | <0,001** |
| Selbsteinschätzung des eigenen Wissens zu Hygienemaßnahmen und Hygienestandards des eigenen Klinikums |           |          |                     |        |           |           |          |                     |        |           |           |          |                     |          |
| 3,05±0,62                                                                                             | 3,29±0,61 | <0,001** | 0,85<br>(0,52-1,39) | 0,515  | 3,09±0,62 | 3,40±0,59 | <0,001** | 0,46<br>(0,23-0,92) | 0,027* | 3,04±0,64 | 3,32±0,58 | <0,001** | 0,41<br>(0,25-0,66) | <0,001** |
| Selbsteinschätzung des eigenen Wissens zu den aktuellen Regeln der Händedesinfektion                  |           |          |                     |        |           |           |          |                     |        |           |           |          |                     |          |
| 3,66±0,53                                                                                             | 3,71±0,48 | 0,098    | 0,94<br>(0,27-3,29) | 0,919  | 3,66±0,52 | 3,75±0,47 | 0,011    | 0,81<br>(0,16-3,95) | 0,790  | 3,61±0,55 | 3,77±0,44 | <0,001** | 0,25<br>(0,06-0,95) | 0,043*   |
| Selbsteinschätzung des eigenen Wissens zur Art der Erfolgskontrolle von Hygienemaßnahmen              |           |          |                     |        |           |           |          |                     |        |           |           |          |                     |          |
| 2,34±0,85                                                                                             | 2,68±0,86 | <0,001** | 0,76<br>(0,56-1,03) | 0,081  | 2,39±0,86 | 2,85±0,80 | <0,001** | 0,57<br>(0,40-0,81) | 0,002* | 2,32±0,86 | 2,74±0,84 | <0,001** | 0,54<br>(0,41-0,70) | <0,001** |
| Selbsteinschätzung des eigenen Wissens Meldepflicht bei bestimmten Erregern                           |           |          |                     |        |           |           |          |                     |        |           |           |          |                     |          |
| 2,31±0,76                                                                                             | 2,65±0,76 | <0,001** | 0,73<br>(0,54-0,99) | 0,049* | 2,37±0,75 | 2,79±0,77 | <0,001** | 0,61<br>(0,43-0,87) | 0,006* | 2,29±0,75 | 2,70±0,74 | <0,001** | 0,44<br>(0,34-0,57) | <0,001** |

Die Tabelle zeigt die Ergebnisse aus dem Vergleich der Fragen zu Selbstvertrauen und Selbsteinschätzung des eigenen Wissens. Die Ergebnisse der einzelnen Items werden als Mittelwert und Standardabweichung (SD) dargestellt. Diese werden sowohl durch einfach Mittelwertvergleiche (p), als auch in einem Logistischen Regressionsmodell (LRM) verglichen. Das LRM enthält neben der Fachrichtung die 1) Erfahrung des Arztes (Assistenzarzt vs. Facharzt), 2) seine Position in der Klinik (Oberarzt/Chefarzt vs. Facharzt/Assistenzarzt), 3) die Anzahl an Fortbildungen, die zum entsprechenden Thema während der letzten 12 Monate besucht wurden. Abkürzungen: MW, Mittelwert; SD, Standardabweichung; p, P-Wert der einfachen Mittelwertvergleiche zwischen den Gruppen; OR (95% CI), Odd's ratio im Vergleich zur Referenzgruppe Anästhesie mit 95% Konfidenzintervall; p-MLRM, p-Wert des LRM. 1) Neben den OberärztInnen fallen auch ChefärztInnen in diese Kategorie; 2) Vergleich zwischen Probanden, die im letzten Jahr mindestens eine Fortbildung zum Thema besucht haben und diesen ohne spezifische diesbezügliche Weiterbildung.
